# Supplementary material
Source: HighWire-hosted journal article supplement (https://bmjpaedsopen.bmj.com/content/8/1/e002748)
Supplement: inline-supplementary-material-1 [file inline-supplementary-material-1.pdf]

**Supplementary table 1:** Summary of pathogen distribution in the external validation cohort (NeoOBS-SA study), based on all culture positive hospital acquired infection episodes (n=186)

| Organism, n (%)                | Blood culture <sup>1</sup> |               | Blood culture and/or CSF |              | Total      |                |
|--------------------------------|----------------------------|---------------|--------------------------|--------------|------------|----------------|
| <b>Gram-negative organisms</b> | <b>92</b>                  | <b>(49.5)</b> | <b>8</b>                 | <b>(4.3)</b> | <b>100</b> | <b>(53.8)</b>  |
| <i>Klebsiella spp.</i>         | 40                         | (21.5)        | 1                        | (0.5)        | 41         | (22.0)         |
| <i>A. baumannii</i>            | 34                         | (18.3)        | 6                        | (3.2)        | 40         | (21.5)         |
| <i>S. marcescens</i>           | 10                         | (5.4)         |                          |              | 10         | (5.4)          |
| <i>E. coli</i>                 | 5                          | (2.7)         | 1                        | (0.5)        | 6          | (3.2)          |
| Other <sup>2</sup>             | 3                          | (1.6)         |                          |              | 3          | (1.6)          |
| <b>Gram-positive organisms</b> | <b>41</b>                  | <b>(22.0)</b> |                          |              | <b>41</b>  | <b>(22.0)</b>  |
| <i>S. aureus</i>               | 17                         | (9.1)         |                          |              | 17         | (9.1)          |
| <i>Enterococcus spp.</i>       | 9                          | (4.8)         |                          |              | 9          | (4.8)          |
| CoNS                           | 12                         | (6.5)         |                          |              | 12         | (6.5)          |
| <i>S. agalactiae</i>           | 3                          | (1.6)         |                          |              | 3          | (1.6)          |
| <b>Fungi</b>                   | <b>23</b>                  | <b>(12.4)</b> |                          |              | <b>23</b>  | <b>(12.4)</b>  |
| <i>C. albicans</i>             | 8                          | (4.3)         |                          |              | 8          | (4.3)          |
| <i>C. parapsilosis</i>         | 8                          | (4.3)         |                          |              | 8          | (4.3)          |
| <i>C. auris</i>                | 4                          | (2.2)         |                          |              | 4          | (2.2)          |
| <i>Other Candida species</i>   | 3                          | (1.6)         |                          |              | 3          | (1.6)          |
| <b>Polymicrobial</b>           | <b>21</b>                  | <b>(11.3)</b> | <b>1</b>                 | <b>(0.5)</b> | <b>22</b>  | <b>(11.8)</b>  |
| <b>Total</b>                   | <b>177</b>                 | <b>(95.2)</b> | <b>9</b>                 | <b>(4.8)</b> | <b>186</b> | <b>(100.0)</b> |

<sup>1</sup>This included 3 central line associated blood stream infections (CLABSI): *S. marcescens* 1, *C. albicans* 1, polymicrobial 1.

<sup>2</sup> Other included *E. cloacae* 1, *Citrobacter freundii* 2
